# Supplementary material for: Platelet Supernatant Suppresses LPS-Induced Nitric Oxide Production from Macrophages Accompanied by Inhibition of NF-κB Signaling and Increased Arginase-1 Expression
Source: PubMed Central journal article supplement (PMC5010197; doi:10.1371/journal.pone.0162208), 2016-09-02
Supplement: pone.0162208.s003.pdf [file pone.0162208.s003.pdf]

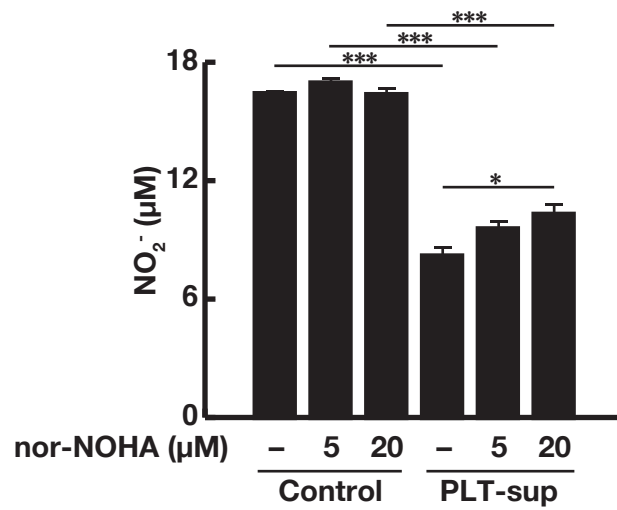

S3 Fig. Effect of an arginase-1 inhibitor on LPS-induced NO production from PLT-BMDMs.
